# Supplementary material for: Two-dimensional MoS2: a platform for constructing three-dimensional structures using RAFT polymerization
Source: Royal Society of Chemistry journal article supplement (doi:10.1039/d0nj03285a), 2020-01-01
Supplement: d0nj03285a1.pdf [file d0nj03285a1.pdf]

## Two-Dimensional MoS<sub>2</sub>: A Platform for Constructing Three-Dimensional Structures by RAFT Polymerization

Zeinab Souri, Mohsen Adeli,\* Ebrahim Mehdipour

<sup>1</sup> Department of Chemistry, Faculty of Chemistry, Lorestan University, Khorramabad, Iran

E-mail: adeli.m@lu.ac.ir

### Results and discussion

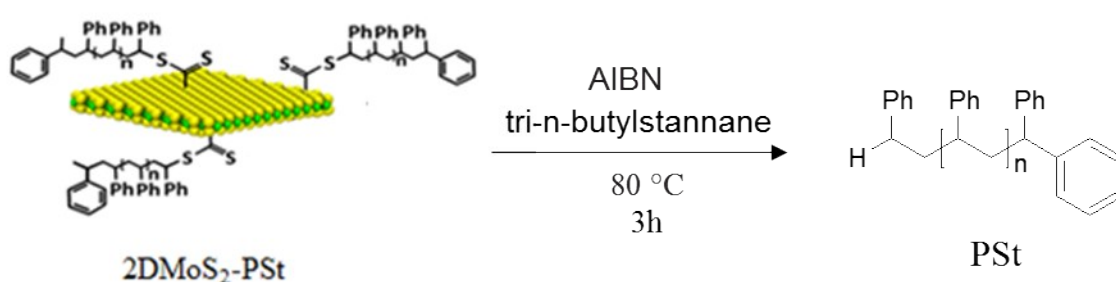

**Fig. S1.** End Group Removal from RAFT-Synthesized Polymers.

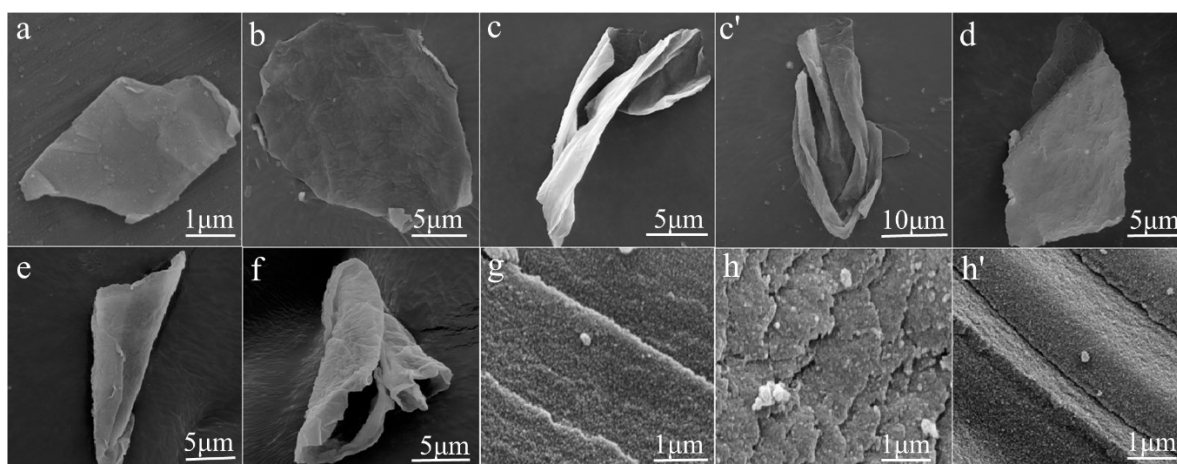

**Fig. S2.** SEM images of (a) MoS<sub>2</sub>, (b) 2DRAFT agent, (c, c') 2DMoS<sub>2</sub>-PSt, (d) 2DMoS<sub>2</sub>-P(St-AM); SEM images of 2DMoS<sub>2</sub>-PStc synthesized using various weight ratios of 2DMoS<sub>2</sub>-PSt: DVB, (e) 1:1, (f) 1:5, (g) 1:10 and (h, h') 1:15, related to 0.05 g of 2DMoS<sub>2</sub>-PSt.

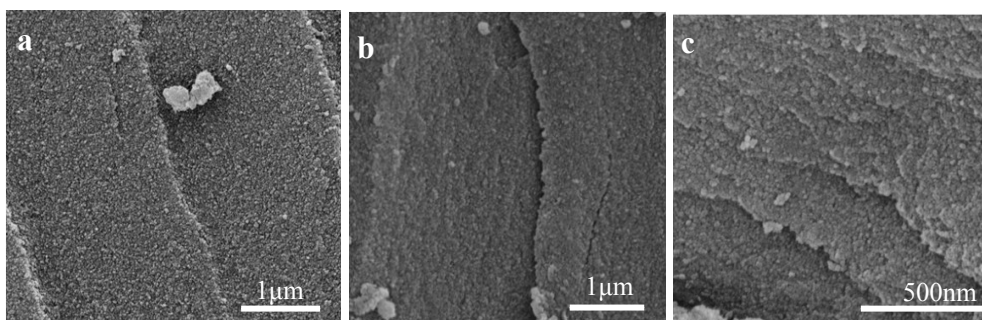

**Fig. S3.** SEM images of 2DMoS<sub>2</sub>-PStc synthesized using (a,b) 1:10 and (c) 1:15 weight ratios of 2DMoS<sub>2</sub> –PSt: DVB.

The temperatures corresponding to 5 and 10 wt% weight loss ( $T_{-5\%}$  and  $T_{-10\%}$ ), which are used to evaluate the decomposition of nanostructure on the onset stage, and 50 wt% weight loss ( $T_{-50\%}$ ) are also reported in Table S1.

**Table S1.** TGA data using various weight ratios of 2DMoS<sub>2</sub> –PSt: DVB, (a) 1:1, (b) 1:5, (c) 1:10 and d) 1:15, in N<sub>2</sub> atmosphere

| Sample | $T_{-5\%}$<br>(°C) | $T_{-10\%}$<br>(°C) | $T_{-50\%}$<br>(°C) | Char residue <sup>a</sup><br>% |
|--------|--------------------|---------------------|---------------------|--------------------------------|
| a      | 250                | 382                 | 416                 | 0.2                            |
| b      | 363                | 388                 | 424                 | 0.12                           |
| c      | 372                | 398                 | 445                 | 0.01                           |
| d      | 408                | 421                 | 452                 | 0.002                          |

<sup>a</sup> at 700 °C
